# Supplementary material for: Aged dissolved organic carbon exported from rivers of the Tibetan Plateau
Source: PLoS One. 2017 May 26;12(5):e0178166. doi: 10.1371/journal.pone.0178166 (PMC5446113; doi:10.1371/journal.pone.0178166)
Supplement: S2 File — (XLSX) [file pone.0178166.s002.xlsx]

## Sheet: Data for Figure 2
	δ13C ‰ - DOC	Δ14C ‰ - DOC	Sampling Year	Location	Reference
Tropical
	-29.6	231	2000-2002	Amazon	Mayorga et al., 2005
	-29.2	157	2000-2002	Amazon	Mayorga et al., 2005
	-29.1	169	2000-2002	Amazon	Mayorga et al., 2005
	-29.3	173	2000-2002	Amazon	Mayorga et al., 2005
	-29.5	169.5	2000-2002	Amazon	Mayorga et al., 2005
	-29.9	116	2000-2002	Amazon	Mayorga et al., 2005
	-29.1667	215.667	2000-2002	Amazon	Mayorga et al., 2005
	-28.75	243	2000-2002	Amazon	Mayorga et al., 2005
	-29.9	96	2000-2002	Amazon	Mayorga et al., 2005
	-29.5	158	2000-2002	Amazon	Mayorga et al., 2005
	-29.7	172	2000-2002	Amazon	Mayorga et al., 2005
	-29.3	175	2000-2002	Amazon	Mayorga et al., 2005
	-28.7	271	2000-2002	Amazon	Mayorga et al., 2005
	-28	197	2000-2002	Amazon	Mayorga et al., 2005
	-29	111	2000-2002	Amazon	Mayorga et al., 2005
	-27.9	153	2000-2002	Amazon	Mayorga et al., 2005
	-27	245	2000-2002	Amazon	Mayorga et al., 2005
	-28.6	199	2000-2002	Amazon	Mayorga et al., 2005
	-25.2	221	2000-2002	Amazon	Mayorga et al., 2005
	-21.8	27	2000-2002	Amazon	Mayorga et al., 2005
	-23.3	-222	2000-2002	Amazon	Mayorga et al., 2005
	-26.6	271	2000-2002	Amazon	Mayorga et al., 2005
	-29.8779	46.8587	2010	Loeka	Marwick et al., 2014
	-26.8286	90.4177	2010	Congo	Marwick et al., 2014
	-29.074	57.3061	2010	Aruwimi	Marwick et al., 2014
	-29.6347	80.3509	2010	Lohulu	Marwick et al., 2014
	-29.2	73.44	2008	Congo	Spencer et al., 2012
	-24.55	-103.5	2004-2008	Rio Loco	Moyer et al., 2013
	-24.075	-41.6667	2004-2008	Rio Loco	Moyer et al., 2013
	-25.3	-258	2004-2008	Rio Loco	Moyer et al., 2013
	-29.2	28	2004-2008	Rio Loco	Moyer et al., 2013
	-29.3	13	2004-2008	Rio Loco	Moyer et al., 2013
	-32	33	2004-2008	Rio Loco	Moyer et al., 2013
	-25.8	43	2004-2008	Rio Loco	Moyer et al., 2013
	-29.7	59.6	*	Mendaram river	Gandois et al., 2014
Temperate
	-26.8546	28.8549	2012	Zambezi	Marwick et al., 2014
	-20.0788	49.9802	2012	Zambezi	Marwick et al., 2014
	-22.961	91.4865	2012	Zambezi	Marwick et al., 2014
	-20.5754	89.0149	2012	Zambezi	Marwick et al., 2014
	-20.7659	94.7144	2012	Zambezi	Marwick et al., 2014
	-20.9265	53.3052	2012	Itezhi	Marwick et al., 2014
		66	2012	Kafue	Marwick et al., 2014
	-23.5	60.5396	2012	Kariba	Marwick et al., 2014
	-19.6144	44.136	2012	Shire	Marwick et al., 2014
	-21.8794	94.4476	2012	Manjaka	Marwick et al., 2014
	-20.4455	67.483	2012	Ikopa	Marwick et al., 2014
	-22.4814	37.995	2012	Androba	Marwick et al., 2014
	-23.2277	154.959	2012	Maintsotady	Marwick et al., 2014
	-26.1593	77.0168	2012	Mavoloa	Marwick et al., 2014
	-23.3793	136.311	2012	Sahatandra	Marwick et al., 2014
	-27.9302	105.219	2012	Faramboa	Marwick et al., 2014
	-27.4502	81.353	2012	Vohitra	Marwick et al., 2014
	-22.5006	-125.604	2012	Athi	Marwick et al., 2014
	-15.9451	114.581	2012	Tsavo	Marwick et al., 2014
	-22.3583	43.6201	2012	Athi	Marwick et al., 2014
	-21.3171	54.6392	2012	Tsavo	Marwick et al., 2014
	-19.4997	-1.9395	2012	Athi	Marwick et al., 2014
	-19.6503	108.992	2012	Tsavo	Marwick et al., 2014
	-27.1	-114	1996-2000	Deleware	Raymond et al.,2004
	-28.2	210	1996-2000	York	Raymond et al.,2004
	-29	82	1996-2000	Parker	Raymond et al.,2004
	-25.2	10	2010	Mississippi (at St. Francisville, LA)	Butman et al., 2014
	-25.9	41	2010	Missouri (at Washington, MO)	Butman et al., 2014
	-27.5	-37	2010	Ohio (at Louisville, KY)	Butman et al., 2014
	-25.1	52	2010	Arkansas (at Pendleton, AR)	Butman et al., 2014
	-28	40.7	2010	Roanoke	Butman et al., 2014
	-26.0833	-158	2010	Santa Clara	Butman et al., 2014
		152	2010	Schuykill	Butman et al., 2014
	-25.4	59	2010	Upper Mississippi (at Louisiana, MO)	Butman et al., 2014
	-25.6	71	2010	Yazoo (at Vicksburg, MS)	Butman et al., 2014
	-24.1	-96	2009	Yellow River	Wang et al., 2012
	-24.4	-108	2009	Changjian （Yangtze River）	Wang et al., 2012
	-25.16	-17.3	2009	San Joaquin	Butman et al., 2012
	-21.57	-39.1	2009	Sacramento	Butman et al., 2012
	-25.38	21.8	2009	St. Lawrence	Butman et al., 2012
	-25.21	18	2009	Columbia	Butman et al., 2012
	-27.79	73.5	2009	Altamaha	Butman et al., 2012
	-20.19	23.5	2009	Mobile	Butman et al., 2012
	-27.24	-62.5	2009	Rio Grande	Butman et al., 2012
	-25.7	-93	2009	Colorado	Butman et al., 2012
	-25.45	-65.4	2009	Susquehanna	Butman et al., 2012
	-26.55	-15	2009	Potomac	Butman et al., 2012
	-25.82	45.5	2009	Mississippi	Butman et al., 2012
	-27.15	-9.49	2009	Connecticut	Butman et al., 2012
	-26.41	39.3	2009	Lower Atchafalaya	Butman et al., 2012
	-26.82	51	2009	Atchafalaya	Butman et al., 2012
		91	2003	Beaverdam Cr	Longworth et al., 2007
	-27.1	103	2003	Caroga Cr.	Longworth et al., 2007
		22	2003	Couch Holow Br.	Longworth et al., 2007
	-27.9	83	2003	Danascara	Longworth et al., 2007
			2003	Fly Br.	Longworth et al., 2007
	-27.7	124	2003	Gordon	Longworth et al., 2007
		118	2003	Kayaderosseras	Longworth et al., 2007
		47	2003	Nowadaga Cr	Longworth et al., 2007
	-28.2	68	2003	Otsquago	Longworth et al., 2007
		31	2003	Schafer's Br	Longworth et al., 2007
	-27.2	89	2003	Schoharia trib	Longworth et al., 2007
	-27.5	68	2003	Wampecack Cr.	Longworth et al., 2007
	-28.6	104	2003	West Cr.	Longworth et al., 2007
		-5	2003	Winnies Hollow Br	Longworth et al., 2007
	-26.2	-202	2009	James River	Lu et al., 2014
	-28.3	114	2009	Mattaponi River	Lu et al., 2014
	-28.2	85	2009	Mattaponi River	Lu et al., 2014
	-26	65	2009	Mattaponi River	Lu et al., 2014
	-28.7	95	2009	Pamunkey River	Lu et al., 2014
	-31.2	86	2009	Pamunkey River	Lu et al., 2014
	-27	80	1998	Harp Lake Basin 3A	Schiff et al., 1997
	-27	100	1998	Harp Lake Basin 4	Schiff et al., 1997
	-27	40	1998	Harp Lake Basin 4-21	Schiff et al., 1997
	-27	180	1998	Harp Lake Basin 5	Schiff et al., 1997
		-58	2003-2004	Foothill grassland	Sickman et al., 2007
		2	2003-2004	Mixed Conifer	Sickman et al., 2007
		-254	2003-2004	Twitchwell Island Drain	Sickman et al., 2007
	-27.45	-74.7398	2010	Beeton Creek	Butman et al., 2014
	-27.51	-54.7851	2010	Black River	Butman et al., 2014
		12.8224	2010	Coldwater Creek	Butman et al., 2014
	-25.89	-140.163	2010	Cooksville Creek (downstream of small WWTP)	Butman et al., 2014
		-31.9	2010	IN15	Butman et al., 2014
	-25.16	-19.1447	2010	Penville Creek	Butman et al., 2014
	-27.51	-28.8739	2010	Sheldon Creek	Butman et al., 2014
	-28.01	-62.8265	2010	Tributary to Boyne River	Butman et al., 2014
		-241.922	2010	Tributary to Schomberg Canal	Butman et al., 2014
		-55.2815	2010	Zephyr Creek	Butman et al., 2014
	-26.75	-1.25	2008-2009	Rote Mulde	Tittel et al,. 2013
	-26.675	13	2008-2009	Weibe Mulde	Tittel et al,. 2013
	-26.5	9	2008-2009	Saubach	Tittel et al,. 2013
	-25.5	-64	1997-1998	Koise	Nara et al., 2010
	-25.8	-95	1997-1998	Sakura	Nara et al., 2010
Arctic
	-27.4	33	2003	Kolyma （Russia）	Neff et al., 2006
	-27	78	2003-2010	Lena （Russia）	Raymond et al., 2007
	-24.9	7	2003-2009	Mackenzie （North America）	Raymond et al., 2007
	-25.6	14	2003-2010	Ob' （Russia）	Raymond et al., 2007
	-25.5	62	2003-2010	Yenisey （Russia）	Raymond et al., 2007
	-26.2	5	2003-2009	Yukon （North America）	Raymond et al., 2007
	-27.33	26.37	2000	Hudson	McCallister et al., 2004
	-28.5	95.9	2008	Billet (Europe, Finland)	Billet et al.,2012
	-28.4	84.1	2008	Billet	Billet et al.,2012
Third Pole-Tibetan Plateau
	-26.863	-50.2	2014	Yellow River	this study
	-26.452	-107.6	2014	Yangtze river	this study
	-22.807	-42.7	2014	Yangtze river	this study
	-25.537	-116.3	2014	Yangtze river	this study
	-25.252	-29.3	2014	Yarlung Tsangpo	this study
		-102.2	2014	Yarlung Tsangpo	this study
	-25.08		2014	Yangtze river	this study
	-23.856	-77.8	2014	Yellow River	this study
	-25.508	-56.6	2014	Yellow River	this study
	-26.925	-69.6	2014	Yellow River	this study
	-26.477	-79.2	2014	Yangtze river	this study
	-23.171	-39.2	2014	Yarlung Tsangpo	this study
	-26.788	27.8	2014	Yarlung Tsangpo	this study

## Sheet: Reference list
	Billett, M.F., Garnett, M.H., Dinsmore, K.J., Dyson, K.E., Harvey, F., Thomson, A.M., Piirainen, S., Kortelainen, P. (2012) Age and source of different forms of carbon released from boreal peatland streams during spring snowmelt in E. Finland. Biogeochemistry 111, 273-286.
	Butman, D., Raymond, P.A., Butler, K., Aiken, G. (2012) Relationships between Δ14C and the molecular quality of dissolved organic carbon in rivers draining to the coast from the conterminous United States. Global Biogeochemical Cycles 26.
	Butman, D.E., Wilson, H.F., Barnes, R.T., Xenopoulos, M.A., Raymond, P.A. (2014) Increased mobilization of aged carbon to rivers by human disturbance. Nature Geoscience 8, 112-116.
	Gandois, L., Teisserenc, R., Cobb, A., Chieng, H., Lim, L., Kamariah, A., Hoyt, A., Harvey, C. (2014) Origin, composition, and transformation of dissolved organic matter in tropical peatlands. Geochimica et Cosmochimica Acta 137, 35-47.
	Longworth, B., Petsch, S., Raymond, P., Bauer, J. (2007) Linking lithology and land use to sources of dissolved and particulate organic matter in headwaters of a temperate, passive-margin river system. Geochimica et Cosmochimica Acta 71, 4233-4250.
	Lu, Y.H., Bauer, J.E., Canuel, E.A., Chambers, R., Yamashita, Y., Jaffé, R., Barrett, A. (2014) Effects of land use on sources and ages of inorganic and organic carbon in temperate headwater streams. Biogeochemistry 119, 275-292.
	Marwick, T.R., Tamooh, F., Teodoru, C.R., Borges, A.V., Darchambeau, F., Bouillon, S. (2015) The age of river‐transported carbon: A global perspective. Global Biogeochemical Cycles 29, 122-137.
	Mayorga, E., Aufdenkampe, A.K., Masiello, C.A., Krusche, A.V., Hedges, J.I., Quay, P.D., Richey, J.E., Brown, T.A. (2005) Young organic matter as a source of carbon dioxide outgassing from Amazonian rivers. Nature 436, 538-541.
	McCallister, S.L., Bauer, J.E., Cherrier, J.E., Ducklow, H.W. (2004) Assessing sources and ages of organic matter supporting river and estuarine bacterial production: A multiple‐isotope (Δ14C, δ13C, and δ15N) approach. Limnology and Oceanography 49, 1687-1702.
	Moyer, R.P., Bauer, J.E., Grottoli, A.G. (2013) Carbon isotope biogeochemistry of tropical small mountainous river, estuarine, and coastal systems of Puerto Rico. Biogeochemistry 112, 589-612.
	Nara, F.W., Imai, A., Matsushige, K., Komatsu, K., Kawasaki, N., Shibata, Y. (2010) Radiocarbon measurements of dissolved organic carbon in sewage-treatment-plant effluent and domestic sewage. Nuclear Instruments and Methods in Physics Research Section B: Beam Interactions with Materials and Atoms 268, 1142-1145.
	Neff, J., Finlay, J., Zimov, S., Davydov, S., Carrasco, J., Schuur, E., Davydova, A. (2006) Seasonal changes in the age and structure of dissolved organic carbon in Siberian rivers and streams. Geophysical Research Letters 33.
	Raymond, P.A., Bauer, J.E., Caraco, N.F., Cole, J.J., Longworth, B., Petsch, S.T. (2004) Controls on the variability of organic matter and dissolved inorganic carbon ages in northeast US rivers. Marine Chemistry 92, 353-366.
	Raymond, P.A., McClelland, J.W., Holmes, R.M., Zhulidov, A.V., Mull, K., Peterson, B.J., Striegl, R.G., Aiken, G.R., Gurtovaya, T.Y. (2007) Flux and age of dissolved organic carbon exported to the Arctic Ocean: A carbon isotopic study of the five largest arctic rivers. Global Biogeochemical Cycles 21, GB4011.
	Schiff, S., Aravena, R., Trumbore, S., Hinton, M., Elgood, R., Dillon, P. (1997) Export of DOC from forested catchments on the Precambrian Shield of Central Ontario: clues from 13C and 14C. Biogeochemistry 36, 43-65.
	Sickman, J., Zanoli, M., Mann, H. (2007) Effects of urbanization on organic carbon loads in the Sacramento River, California. Water Resources Research 43.
	Spencer, R.G., Hernes, P.J., Aufdenkampe, A.K., Baker, A., Gulliver, P., Stubbins, A., Aiken, G.R., Dyda, R.Y., Butler, K.D., Mwamba, V.L. (2012) An initial investigation into the organic matter biogeochemistry of the Congo River. Geochimica et Cosmochimica Acta 84, 614-627.
	Tittel, J., Büttner, O., Freier, K., Heiser, A., Sudbrack, R., Ollesch, G. (2013) The age of terrestrial carbon export and rainfall intensity in a temperate river headwater system. Biogeochemistry 115, 53-63.
	Wang, X., Ma, H., Li, R., Song, Z., Wu, J. (2012) Seasonal fluxes and source variation of organic carbon transported by two major Chinese Rivers: The Yellow River and Changjiang (Yangtze) River. Global Biogeochemical Cycles 26.
